# Supplementary material for: The impacts of uncertainties in emissions on aerosol data assimilation and short-term PM&lt;sub&gt;2.5&lt;/sub&gt; predictions in CMAQ v5.2.1 over East Asia
Source: Copernicus journal article supplement (doi:10.5194/gmd-2020-116), 2020-05-15
Supplement: Supplementary file 1 [file gmd-2020-116-supplement.pdf]

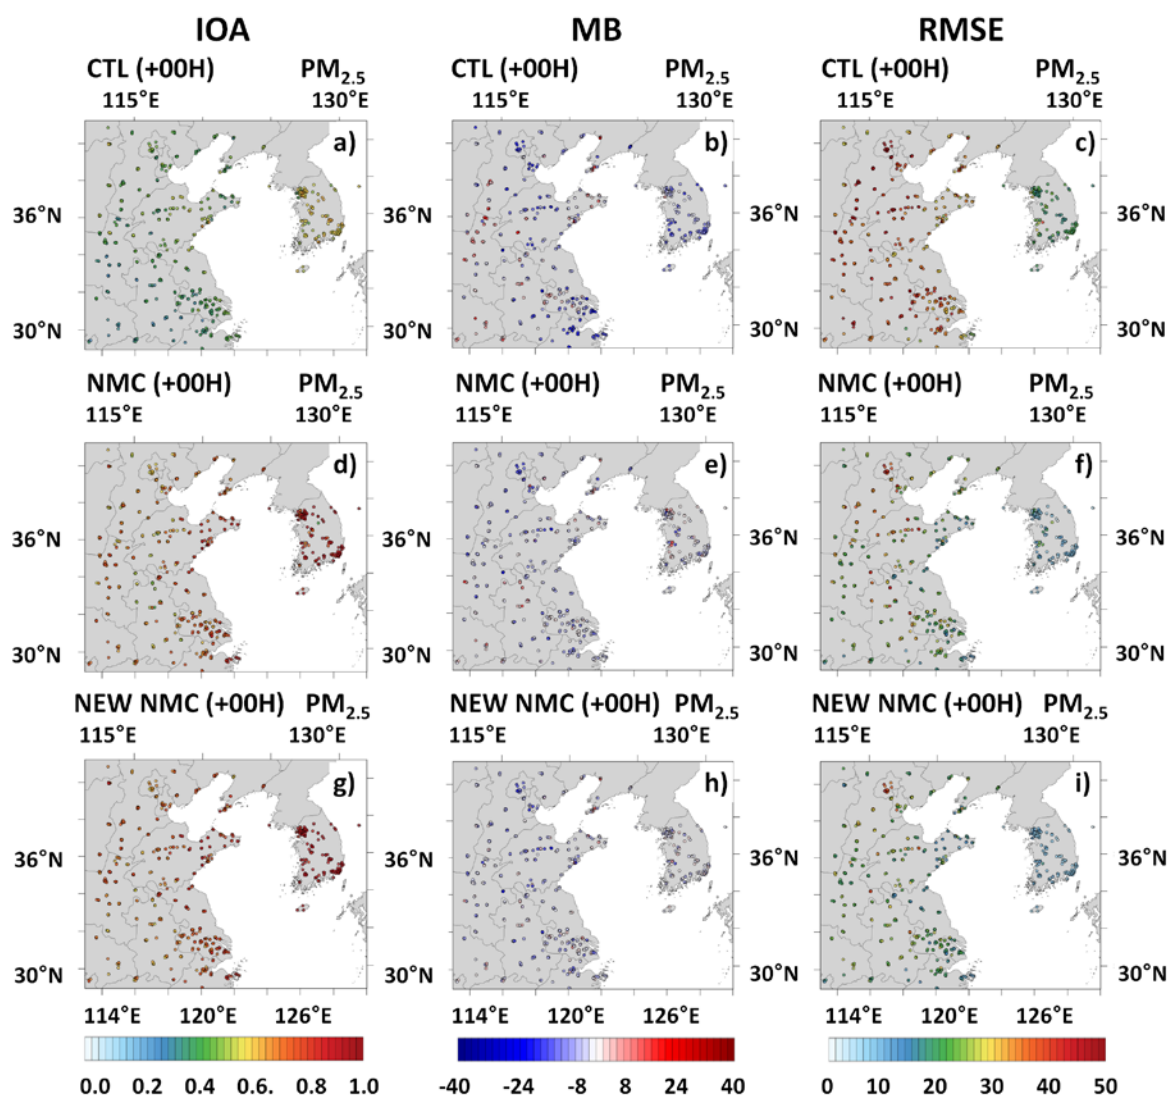

**Figure S1.** Statistical metrics of IOA (first column), MB (second column), and RMSE (third column) for BASE (top row), NMC (middle row), and NEW NMC (bottom row) simulations at  $PM_{2.5}$  measurements over Northeast Asia. All model data are validated at 00, 06, 12, and 18 UTC during the period of 1 May to 14 June, 2016.

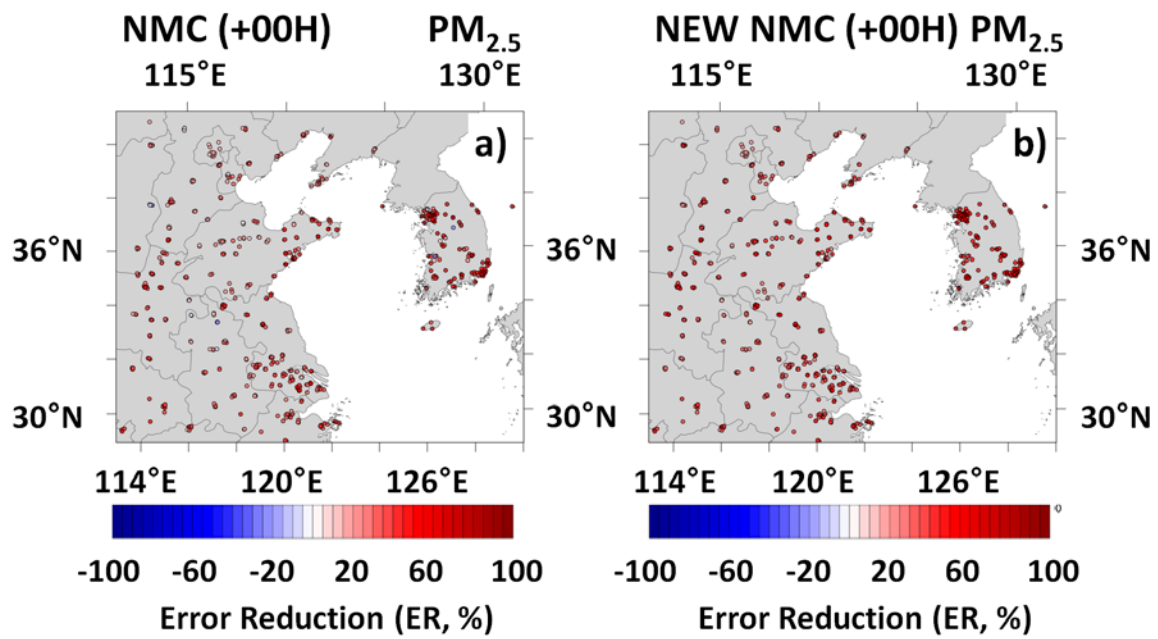

**Figure S2.** Same as Fig. S1, except for error reduction (ER) by the NMC (left), and the NEW NMC (right) methods.
